# Supplementary material for: Impact of ammonium sulfite-based sequential pretreatment combinations on two distinct saccharifications of wheat straw
Source: Royal Society of Chemistry journal article supplement (doi:10.1039/d0ra01759k), 2020-01-01
Supplement: d0ra01759k1.pdf [file d0ra01759k1.pdf]

## **Impact of ammonium sulfite-based sequential pretreatment combinations on two distinct saccharification of wheat straw**

Guang Yu <sup>a, b</sup>, Shiyue Liu <sup>a, b</sup>, Xiaoyan Feng <sup>a</sup>, Yuedong Zhang <sup>a</sup>, Chao Liu <sup>a</sup>, Ya-Jun Liu <sup>a, \*</sup>,  
Bin Li <sup>a, \*</sup>, Qiu Cui <sup>a</sup>, and Hui Peng <sup>a, \*</sup>

<sup>a</sup> CAS Key Laboratory of Biofuels, Shandong Provincial Key Laboratory of Synthetic  
Biology, Shandong Engineering Laboratory of Single Cell Oil, Qingdao Engineering  
Laboratory of Single Cell Oil, Dalian National Laboratory for Clean Energy, Qingdao  
Institute of Bioenergy and Bioprocess Technology, Chinese Academy of Sciences, Qingdao,  
266101, China

<sup>b</sup> University of Chinese Academy of Sciences, Beijing 100049, China

### **\*Corresponding authors**

E-mail addresses: [libin@qibebt.ac.cn](mailto:libin@qibebt.ac.cn) (B. Li); [liuyj@qibebt.ac.cn](mailto:liuyj@qibebt.ac.cn) (Y-J. Liu);  
[penghui@qibebt.ac.cn](mailto:penghui@qibebt.ac.cn) (H. Peng)

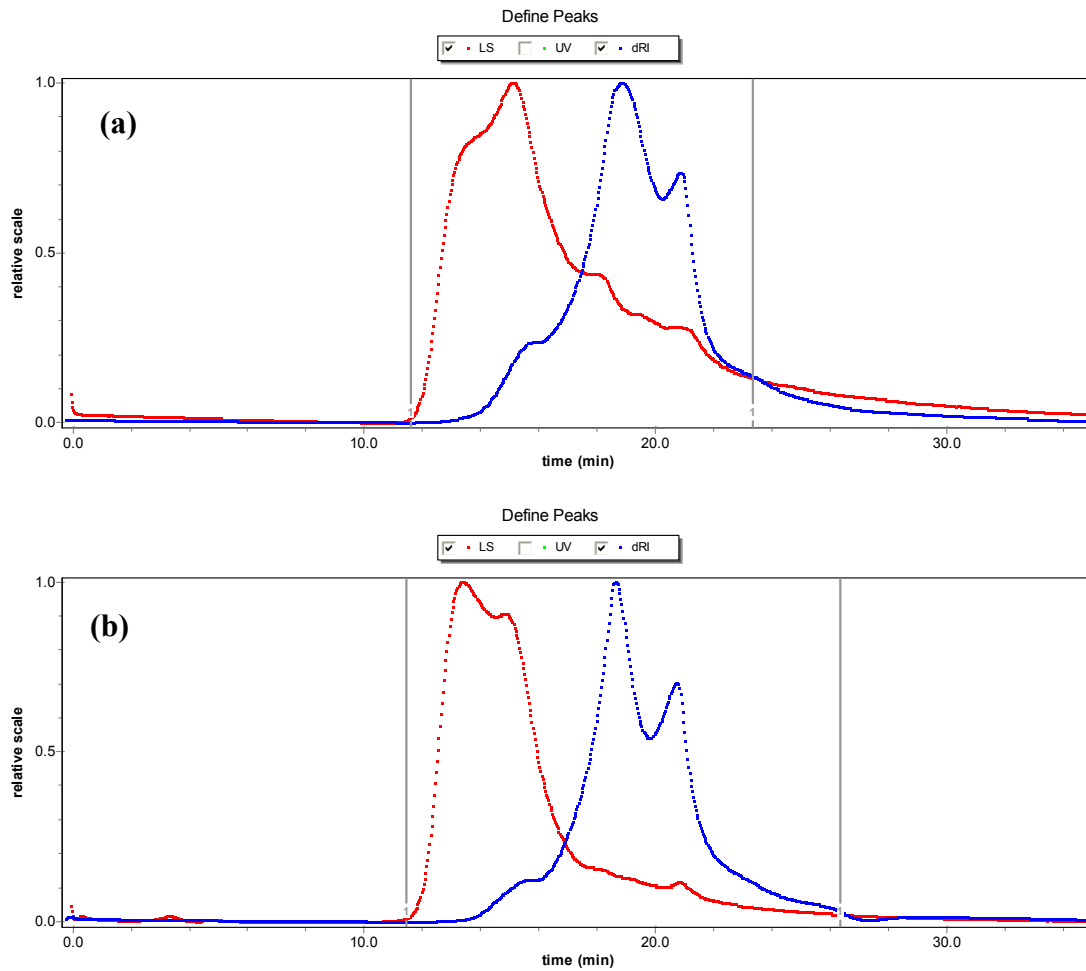

**Figure S1** GPC spectra of lignin in spent liquor from AS pretreatment (a. the lignin from the first step of AS+HT pretreatment; b. the lignin from the second step of HT+AS pretreatment)

**Table S1** Assignments of  $^{13}\text{C}$ - $^1\text{H}$  correlation signals in the HSQC spectra of the lignin fractions in AS pretreatment spent liquor

| Label                    | $\delta_{\text{C}} / \delta_{\text{H}}$ | Assignment                                                                            |
|--------------------------|-----------------------------------------|---------------------------------------------------------------------------------------|
| B $_{\beta}$             | 53.28/3.09                              | C $_{\beta}$ -H $_{\beta}$ in resinol substructures (B)                               |
| -OCH $_3$                | 56/3.73                                 | C-H in methoxyls                                                                      |
| A $_{\gamma}$            | 59.86-60.97/3.31-3.65                   | C $_{\gamma}$ -H $_{\gamma}$ in $\beta$ -O-4' substructures (A)                       |
| X $_5$                   | 62.8/3.23                               | C $_5$ -H $_5$ in $\beta$ -D-xylopyranoside                                           |
| A' $_{\gamma}$           | 62.8/3.96                               | C $_{\gamma}$ -H $_{\gamma}$ in $\gamma$ -acylated $\beta$ -O-4' substructures (A')   |
| A'' $_{\gamma}$          | 63.11/4.18                              | C $_{\gamma}$ -H $_{\gamma}$ in $\gamma$ -acylated $\beta$ -O-4' substructures (A'')  |
| B $_{\gamma}$            | 71/3.8, 4.2                             | C $_{\gamma}$ -H $_{\gamma}$ in resinol substructures (B)                             |
| A $_{\alpha}$            | 71.8/4.6                                | C $_{\alpha}$ -H $_{\alpha}$ in $\beta$ -O-4' substructures (A)                       |
| X $_2$                   | 72.79/3.13                              | C $_2$ -H $_2$ in $\beta$ -D-xylopyranoside                                           |
| X $_4$                   | 76.35/3.63                              | C $_4$ -H $_4$ in $\beta$ -D-xylopyranoside                                           |
| X $_3$                   | 77.46/3.76                              | C $_3$ -H $_3$ in $\beta$ -D-xylopyranoside                                           |
| D $_{\beta'}$            | 80.8/4.01                               | C $_{\beta'}$ -H $_{\beta'}$ in spirodienone substructures (D)                        |
| D $_{\alpha}$            | 80.8/5.07                               | C $_{\alpha}$ -H $_{\alpha}$ in spirodienone substructures (D)                        |
| A $_{\beta(\text{G/H})}$ | 82.9/4.38                               | C $_{\beta}$ -H $_{\beta}$ in $\beta$ -O-4' substructures linked to G and H units (A) |
| A $_{\beta(\text{S})}$   | 84.6/4.13                               | C $_{\beta}$ -H $_{\beta}$ in $\beta$ -O-4' substructures linked to S units (A)       |
| S $_{2,6}$               | 103.6/6.37                              | C $_{2,6}$ -H $_{2,6}$ in etherified syringyl units (S)                               |
| S' $_{2,6}$              | 106.9/6.64                              | C $_{2,6}$ -H $_{2,6}$ in oxidized (C $_{\alpha}$ =O) syringyl units (S')             |
| G $_2$                   | 107.5/6.48                              | C $_2$ -H $_2$ in guaiacyl units (G)                                                  |
| G' $_2$                  | 113.2/6.92                              | C $_2$ -H $_2$ in oxidized (C $_{\alpha}$ =O) guaiacyl units (G')                     |
| G $_5$                   | 115.3/6.74                              | C $_5$ -H $_5$ in guaiacyl units (G)                                                  |
| G $_6$                   | 122.3/6.79                              | C $_6$ -H $_6$ in guaiacyl units (G)                                                  |
| H $_{2,6}$               | 130.5/7.17                              | C $_{2,6}$ -H $_{2,6}$ in p-hydroxyphenyl units (H)                                   |

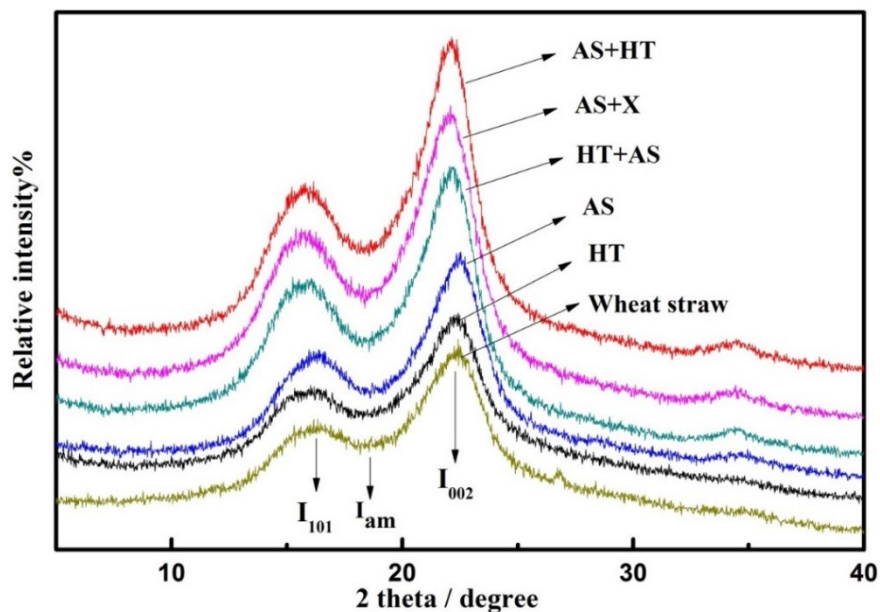

**Figure S2** X-ray diffraction images of raw and pretreated wheat straw

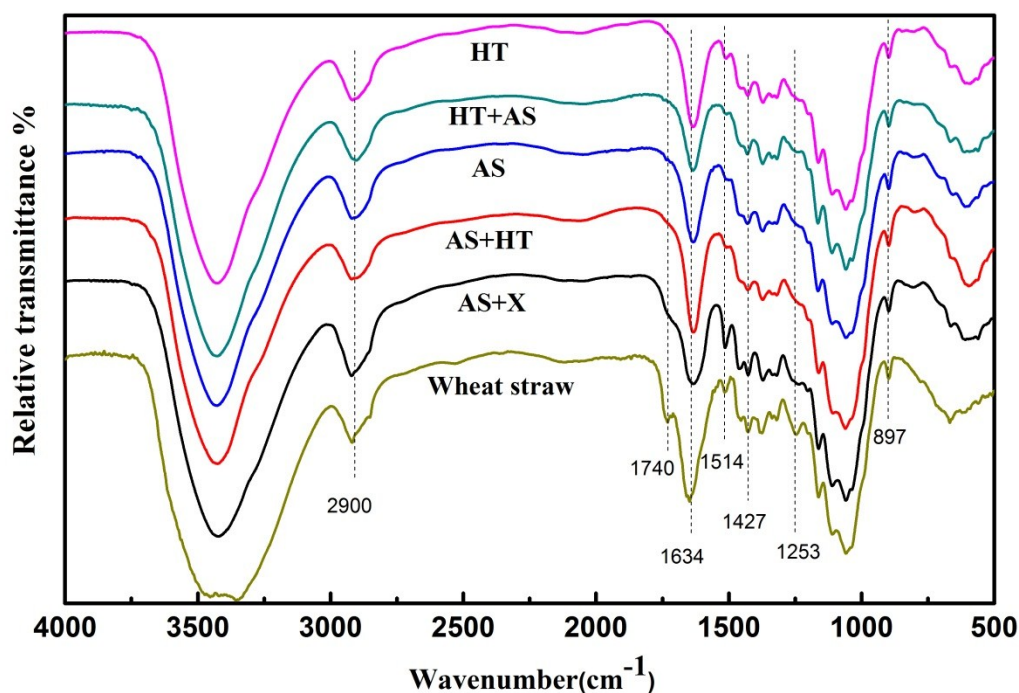

**Figure S3** FTIR spectra of raw and pretreated wheat straw

**Table S2** FTIR peak assignments of raw and pretreated wheat straw

| Wavenumber (cm <sup>-1</sup> ) | Peak assignment                                      | Components                                             |
|--------------------------------|------------------------------------------------------|--------------------------------------------------------|
| 897                            | Anomeric vibration at $\beta$ -glycosidic linkage    | Polysaccharides                                        |
| 1253                           | C—O stretching vibration                             | Aryl ring of lignin                                    |
| 1427                           | CH bending vibration of CH <sub>3</sub>              | Phenolic lignin                                        |
| 1514                           | Aromatic skeletal vibration                          | Lignin                                                 |
| 1634                           | Aromatic skeletal vibration                          | Lignin                                                 |
| 1740                           | C=O stretching in acetyl groups and carboxylic acids | Acetyl groups on heteromannans and heteroxylans        |
| 2900                           | Asymmetric stretching vibration of methylene groups  | Lignin and Polysaccharides                             |
| 3400                           | Stretch of —OH groups                                | alcoholic hydroxyl group of lignin and Polysaccharides |

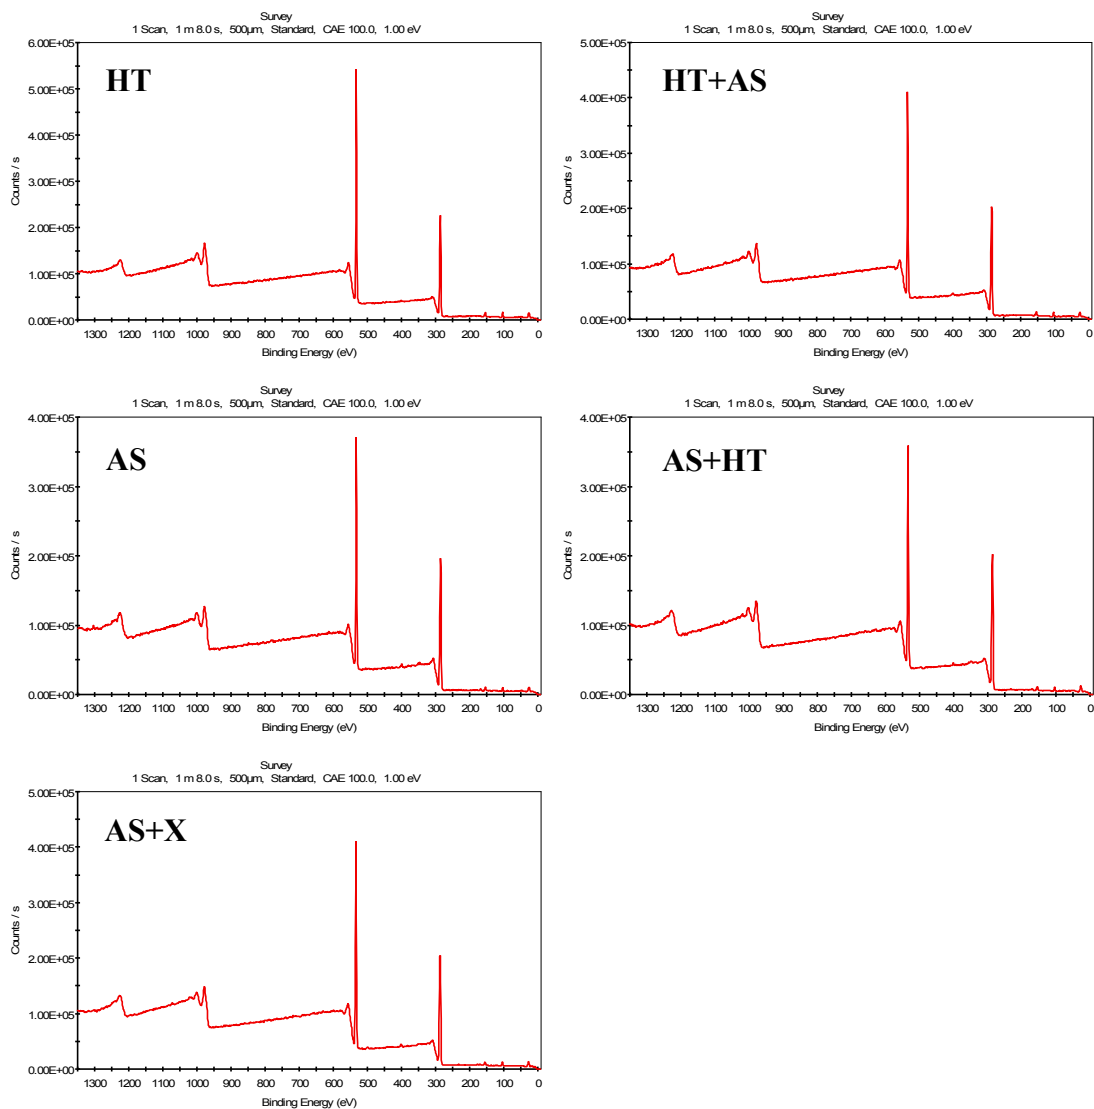

**Figure S4** XPS spectra of pretreated wheat straw
